# Tamoxifen and Ovarian Function

Martine Berliere<sup>1,3\*</sup>, Francois P. Duhoux<sup>1,3</sup>, Florence Dalenc<sup>2</sup>, Jean-Francois Baurain<sup>3</sup>, Laurence Dellevigne<sup>1</sup>, Christine Galant<sup>1</sup>, Aline Van Maanen<sup>4</sup>, Philippe Piette<sup>1</sup>, Jean-Pascal Machiels<sup>1,3</sup>

**1** Clinique du sein, Centre du Cancer, Cliniques universitaires Saint-Luc, Université catholique de Louvain, Brussels, Belgium, **2** Service d'oncologie médicale, Centre Claudius Regaud, Toulouse, France, **3** Service d'oncologie médicale, Cliniques universitaires Saint-Luc; Institut de Recherche Clinique et Expérimentale (pôle MIRO), Université catholique de Louvain, Brussels, Belgium, **4** Statistical Unit, Centre du Cancer, Cliniques Universitaires St Luc, Université catholique de Louvain, Brussels, Belgium

## Abstract

**Background:** Some studies suggest that the clinical parameter “amenorrhea” is insufficient to define the menopausal status of women treated with chemotherapy or tamoxifen. In this study, we investigated and compared the ovarian function defined either by clinical or biological parameters in pre-menopausal breast cancer patients treated with tamoxifen administered as adjuvant therapy.

**Materials and Methods:** Between 1999 and 2003, 138 premenopausal patients consecutively treated for early breast cancer were included. Sixty-eight received tamoxifen in monotherapy as the only adjuvant systemic treatment (Group I) and 70 were treated with tamoxifen after adjuvant chemotherapy (Group II). All patients had a confirmed premenopausal status based on clinical parameters and hormonal values at study entry. They were followed prospectively every 3 months for 3 years: menses data, physical examination and blood tests (LH, FSH, 17-beta-estradiol). Vaginal ultrasonography was carried out every 6 months. After 3 years, prospective evaluation was completed and monitoring of ovarian function was performed as usual in our institution (1x/year). All data were retrospectively evaluated in 2011.

**Results:** Three patients were excluded from the study in group I and 2 were excluded in group II. Patients were divided into 4 subgroups according to clinical data, i.e. menses patterns. These patterns were assessed by questionnaires. a: Regular menses (>10 cycles/year) b: Oligomenorrhea (5 to 9 cycles/year) c: Severe oligomenorrhea (1 to 4 cycles/year) d: Complete amenorrhea. Estrogen levels did not appear to have any impact on disease-free survival rates after 3 or 8 years. FSH values were also documented and analyzed. They exhibited the same profile as estradiol values.

**Conclusions:** Amenorrhea is an insufficient parameter to define menopausal status in patients receiving tamoxifen. Low estradiol levels must be coupled with other biological parameters to characterize endocrine status. These data are very important for the choice of endocrine therapy.

**Citation:** Berliere M, Duhoux FP, Dalenc F, Baurain J-F, Dellevigne L, et al. (2013) Tamoxifen and Ovarian Function. PLoS ONE 8(6): e66616. doi:10.1371/journal.pone.0066616

**Editor:** Salomon M. Stemmer, Davidoff Center, Israel

**Received:** December 6, 2012; **Accepted:** May 7, 2013; **Published:** June 28, 2013

**Copyright:** © 2013 Berliere et al. This is an open-access article distributed under the terms of the Creative Commons Attribution License, which permits unrestricted use, distribution, and reproduction in any medium, provided the original author and source are credited.

**Funding:** The authors have no support or funding to report.

**Competing Interests:** The authors have declared that no competing interests exist.

\* E-mail: martine.berliere@uclouvain.be

## Introduction

Adjuvant endocrine therapy reduces tumor recurrence and mortality in pre- and postmenopausal women with hormone receptor-positive early breast cancer [1,2,3]. Before the aromatase inhibitor era, tamoxifen was the accepted adjuvant endocrine therapy for both pre- and postmenopausal women with hormone receptor-positive breast cancers. Today, tamoxifen remains the standard of care for premenopausal women. However, in the first Early Breast Cancer Trialists' Collaborative Group (EBCTCG) meta-analysis [4], tamoxifen appeared to provide little benefit for premenopausal women. For this reason, many trials on adjuvant therapy in premenopausal women subsequently focused on ovarian ablation and chemotherapy [4,5,6]. Later EBCTCG [6] updates showed substantial benefits of tamoxifen in women under 50 years of age with hormone receptor-positive disease. Results revealed a 45% reduction in the risk of recurrence and a 32% decrease in the risk of death, irrespective of chemotherapy. Trials on tamoxifen associated with ovarian function suppression have

also been conducted but the results are still unknown and data from some trials will probably be published in the course of 2013. Furthermore, it has not yet been established whether the use of an aromatase inhibitor with ovarian function suppression is superior to tamoxifen alone or tamoxifen plus ovarian function suppression. The benefits and risks of these associations will be better defined when the results from the SOFT and TEXT trials will be available.

In this study, we investigated and compared the ovarian function defined either by clinical or biological parameters [7,8,9] in pre-menopausal breast cancer patients treated with tamoxifen administered as adjuvant therapy.

## Materials and Methods

### Ethics statement

Our study is an observational study for which we obtained the agreement of our ethics committee (Commission d'éthique

biomédicale Hospitalo-Facultaire de l'Université catholique de Louvain, date of agreement 4th April 2011). Written consent given by the patients was not needed because our observational study included patients between 1999 and 2003 before the implementation by the Belgian parliament on 7th May 2004 of the European directive 2001/20/EC (<http://eur-lex.europa.eu/LexUriServ.do?uri=CELEX:32001L0020:en:NOT>). The data were analyzed anonymously and patients could not be identified from the unique study number that they were assigned. No additional laboratory tests were performed beyond those recommended by local guidelines.

### Inclusion criteria

Eligible patients were required to have histologically or cytologically proven early breast cancer treated with curative-intent surgery, estrogen (ER) and/or progesterone (PR) receptors detected on the tumor by immunohistochemistry, no distant metastases, and a confirmed premenopausal status defined as estradiol >40 pg/ml, LH <18.7 mUI/ml, and FSH <45.7 mUI/mL (values defined by our laboratory) before the initiation of adjuvant chemotherapy or tamoxifen. In group II, the entry point was determined by recovery of premenopausal hormone values (some patients had already received tamoxifen for 2 or 3 months).

Menopausal values were defined by high FSH values >45.7 mUI/ml, low levels of estrogens and clinical amenorrhea >one year.

### Study design

This was a retrospective monocentric study performed at Cliniques universitaires Saint-Luc (Brussels). Patients were followed prospectively every 3 months for 3 years: menses data, physical examination and blood tests (LH, FSH, 17-beta-estradiol). To observe cyclic changes of hormonal values, samples were taken on different days, at different points of the cycle. Vaginal ultrasonography was carried out every 6 months. After 3 years, prospective evaluation was completed and monitoring of ovarian function was performed as usual in our institution (1x/year). All data were prospectively collected.

### Statistical analysis

Statistical analysis was performed using the Welch two sample t-test (comparison of hormone values) between subgroups. p-values <0.05 were considered as statistically significant. Survival and disease-free survival were calculated from the date of surgery using the Kaplan-Meier method. A Cox proportional hazard ratio test was also used to evaluate the interaction of estrogen variations and disease-free survival or the absence of interaction.

### Endpoints

The main aim of the study was the comparison between ovarian function defined by clinical *vs.* biological parameters in premenopausal breast cancer patients treated with tamoxifen administered as adjuvant therapy.

A secondary objective was the evaluation of the impact of high *vs.* low estrogen levels on disease-free survival after 3, 5 or 8 years in premenopausal breast cancer patients receiving tamoxifen.

To define menopausal status and premenopausal status, we used the values of our laboratory that correspond to hormonal values usually used in Europe. The values of the NCCN (National Comprehensive Cancer Network) were for menopausal status FSH values >40 UI/l, low estrogen levels and absence of menses for more than one year.

## Results

### Patients' characteristics

Patients' and tumor characteristics are summarized in table 1. Between 1999 and 2003, 138 premenopausal patients treated for early breast cancer were included in the study. Sixty-eight patients received tamoxifen 20 mg as the only systemic adjuvant treatment (Group I) and 70 were treated with tamoxifen 20 mg after adjuvant chemotherapy (6 cycles of FEC 100 on day 1 every 3 weeks [5-fluorouracil 500 mg/m<sup>2</sup>, epirubicin 100 mg/m<sup>2</sup> and cyclophosphamide 500 mg/m<sup>2</sup>] or 4 cycles of EC on day 1 every 3 weeks [epidriamycine 75 mg/m<sup>2</sup> and cyclophosphamide 500 mg/m<sup>2</sup>]) (Group II). Radiation therapy was systematically administered after conservative surgery and was only administered after mastectomy if lymph nodes were invaded.

Median age was 44.5 years (range: 36–48) in group I and 42 years (range: 35–47.5) in group II. In group I, all patients were American Joint Committee on Cancer, 2009 (AJCC) stage I, while in group II, 34 were AJCC stage I and 36 AJCC stage II. Three patients were excluded from the study in group I (2 underwent hysterectomy for benign myomas and 1 received an LHRH agonist for recurrent ovarian cysts) and 2 were excluded in group II (1 received an LHRH agonist for ovarian cysts and 1 showed metastatic evolution after 10 months).

### Clinical and biological menopausal status

Menopausal status is a major consideration in adjuvant [7] breast cancer therapy. Unfortunately, there is no universal definition of menopausal status.

According to the clinical data about their bleeding patterns (table 2), patients were first classified in 2 groups: patients with regular menses and patients with irregular menses. In an attempt to classify more precisely bleeding irregularities, patients were subsequently divided into 4 subgroups: (a) regular menses ( $\geq 10$  cycles/year), (b) oligomenorrhea (5 to 9 cycles/year), (c) severe oligomenorrhea (1 to 4 cycles/year), and (d) complete amenorrhea. Data about the bleeding patterns were available for all patients before the start of any breast cancer treatment. For patients in group II, data were available at the end of chemotherapy and for all patients, data were available during tamoxifen treatment. Before beginning any treatment, 60/65 patients (92.3%) in group I had regular menses and 5 patients (7.7%) exhibited oligomenorrhea. In group II, 65 patients had regular menses (95.5%) and 3 (4.5%) patients mentioned oligomenorrhea. For patients receiving chemotherapy, data indicated that in the EC arm, 31/34 patients (91.1%) recovered regular menses before receiving tamoxifen and 3 patients (8.9%) had oligomenorrhea. In the FEC arm (34 patients), 5 patients (14.7%) recovered regular menses, 5 patients had oligomenorrhea (14.7%) and 24 patients (70.6%) were still amenorrheic at study entry. While on tamoxifen therapy, the number of patients in each subgroup (a, b, c and d) was 3 (4%), 19 (29%), 38 (55%) and 5 (8%) in group I (65 patients) and 2 (3%), 21 (30%), 38 (55%) and 7 (10%) in group II (68 patients), respectively.

Hormonal values are summarized in Table 3 and shown in Fig 1 and 2. The most interesting parameter seemed to be the estradiol levels (Table 3).

For patients in subgroup a, tamoxifen mimicked ovulatory cycles such as those observed in patients receiving clomiphene citrate (regular menses with high levels of estradiol). In contrast, for patients in subgroup b, hormonal variations corresponded to a shift between normal spontaneous ovulatory and anovulatory cycles.

**Table 1.** Patients' and tumor characteristics.

|                              | Group I                        | Group II                       |
|------------------------------|--------------------------------|--------------------------------|
| <b>N° of patients</b>        | <b>68 (3 excluded)<br/>-65</b> | <b>70 (2 excluded)<br/>-68</b> |
| <b>T stage</b>               |                                |                                |
| T1a                          | 4                              | 0                              |
| T1b                          | 53                             | 2                              |
| T1c                          | 8                              | 40                             |
| T2                           | 0                              | 26                             |
| <b>Grade</b>                 |                                |                                |
| Grade I                      | 21                             | 10                             |
| Grade II                     | 41                             | 32                             |
| Grade III                    | 3 (all T1a)                    | 26                             |
| <b>Hormone receptors</b>     |                                |                                |
| ER and PR +                  | 62                             | 64                             |
| ER + and PR -                | 3                              | 3                              |
| ER - and PR +                | 0                              | 1                              |
| <b>Margins</b>               | Free                           | Free                           |
| <b>Type of surgery</b>       |                                |                                |
| Mastectomy                   | 1                              | 20                             |
| Lumpectomy                   | 64                             | 48                             |
| <b>Age</b>                   | 36 to 48<br>(mean 44.5)        | 32 to 47.5 (mean 42)           |
| <b>Lymph nodes</b>           |                                |                                |
| N0                           | 65/65                          | 34 (stage I)                   |
| N1                           |                                | 34 (stage II)                  |
| 1 to 3 nodes                 |                                | 32                             |
| >3 nodes                     |                                | 2                              |
| <b>Histology</b>             |                                |                                |
| Infiltrating lobular         | 7                              | 8                              |
| Infiltrating ductal          | 58                             | 60                             |
| <b>Number of pregnancies</b> |                                |                                |
| 0                            | 7                              | 6                              |
| 1                            | 15                             | 13                             |
| 2                            | 25                             | 30                             |
| 3                            | 13                             | 11                             |
| >3                           | 5                              | 8                              |
| <b>Chemotherapy</b>          | 0/65                           | 68/68                          |
| 4 EC                         |                                | 34                             |
| 6 FEC                        |                                | 34                             |
| *                            |                                | EC FEC                         |
| <b>Re</b>                    | 6                              |                                |
| -o                           |                                |                                |
| <b>Radiotherapy</b>          | 64/65                          | 65/68                          |

ER: estrogen, PR: progesterone, \* data after adjuvant chemotherapy for group II. doi:10.1371/journal.pone.0066616.t001

For patients in subgroups c and d, tamoxifen induced low estradiol, LH and FSH, responsible for severe oligomenorrhea or complete amenorrhea.

All patients, after cessation of tamoxifen, recovered menses and have samples of FSH taken on day 3, showing low FSH values (confirmation of premenopausal status).

**Table 2.** Menses patterns.

|                                     | Group I | Group II                            |
|-------------------------------------|---------|-------------------------------------|
| <b>N° of patients</b>               | 65      | 68                                  |
| <b>Pretreatment data</b>            |         |                                     |
| - Regular menses                    | 60      | 65                                  |
| - Oligomenorrhea                    | 5       | 3                                   |
| <b>Postchemotherapy data</b>        |         | EC arm (n = 34)    FEC arm (n = 34) |
| - Regular menses                    |         | 31                    5             |
| - Oligomenorrhea                    |         | 3                      5            |
| - Amenorrhea                        |         | 24                                  |
| <b>While on tamoxifen treatment</b> |         |                                     |
| - Regular menses                    | 3       | 2                                   |
| - Oligomenorrhea                    | 19      | 21                                  |
| - Severe oligomenorrhea             | 38      | 38                                  |
| - Amenorrhea                        | 5       | 7                                   |

doi:10.1371/journal.pone.0066616.t002

For all patients of stage I (group I n = 65 patients and group II n = 34 patients), no impact of estrogen levels on DFS was observed: p = 0.877. For patients of group II, (34 patients stage I and 34 patients stage II), the same analysis was performed and the results confirmed that the variations of estrogen levels induced by tamoxifen had no statistically significant impact on DFS: patients of stage I p = 0.682 and patients of stage II p = 0.271.

**Disease-free survival and overall survival**

Disease-free survival and overall survival of groups I and II are shown in Figure 3 and were in the expected ranges. No statistical difference concerning disease-free survival was observed between patients with high estrogen levels (subgroups a and b) and those with low estrogen levels (subgroups c and d) (figure 4).

**Discussion**

In this study, all patients presenting with breast cancer were premenopausal. Their premenopausal status was confirmed by

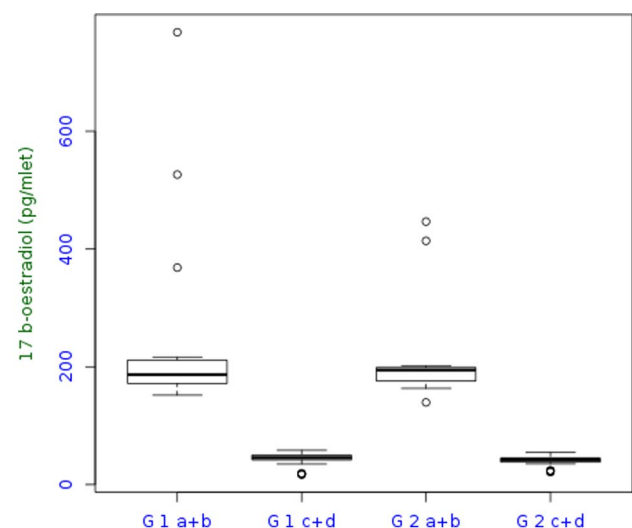

**Figure 1. Median 17-beta-estradiol level.**

doi:10.1371/journal.pone.0066616.g001

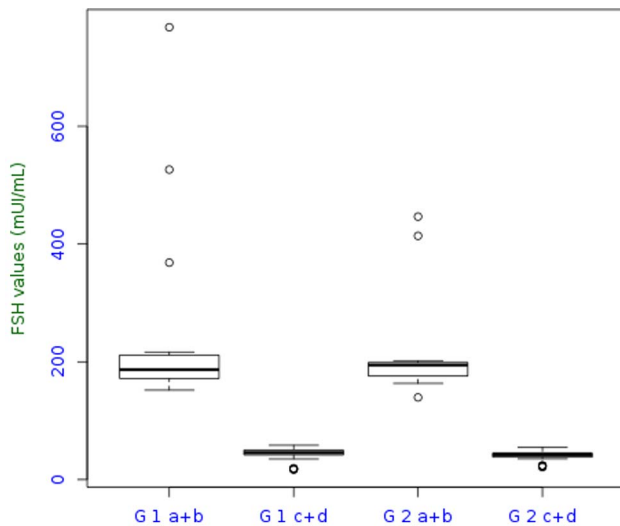

**Figure 2. Median FSH level.**  
doi:10.1371/journal.pone.0066616.g002

hormone values associated with clinical signs. For patients not receiving chemotherapy, determination of premenopausal status before tamoxifen is straightforward, but for those receiving chemotherapy, it is more problematic. It is known that adjuvant chemotherapy can induce chemotherapy-related amenorrhea, which temporarily suppresses menses [2,10,11,12,13,14]. It is therefore very important to obtain hormonal values associated with information about the presence of menses. Adjuvant chemotherapy is also thought to indirectly induce a temporary or complete ovarian suppression. Thus, the presence or absence of menses is insufficient to demonstrate menopausal or premenopausal status, and biological data are required. In case of biologically confirmed premenopausal status, contraception is required while on tamoxifen treatment.

In our study, it was interesting to note that patients receiving tamoxifen both alone and after chemotherapy showed similar menses patterns with a similar distribution of patients between regular and irregular menses. In group I, 22/65 patients had regular menses or light oligomenorrhea, while 23/68 patients exhibited the same pattern of menses in group II. As for severe oligomenorrhea and complete amenorrhea, the numbers were respectively 43 patients in group I and 45 patients in group II. Therefore, chemotherapy did not appear to influence ovarian response to tamoxifen, which exerted its own effect, independently of cytotoxic therapy

Tamoxifen may increase plasma estrogen concentrations by interfering with normal negative pituitary feed-back mechanisms [14,15]. The impact of tamoxifen on ovarian function is not well understood, especially since the number of premenopausal patients not receiving adjuvant chemotherapy in the literature is very small. In a meta-analysis by the EBCTCG published in 1991 [4], only 107 premenopausal patients were included in evaluated studies. The 2005 update of the EBCTCG meta-analysis of tamoxifen trials yielded consolidated data on hormonal treatment of premenopausal patients. Data on the interaction of tamoxifen with ovarian function are nevertheless seriously lacking in the literature [16,17]. In an old study by Manni [15] on metastatic breast cancer patients, the effect of tamoxifen on menstrual cycles ranged from no effect at all to complete cessation of menses. However, in this small study (only 11 patients), the authors observed that amenorrhea was more frequent in patients receiving

**Table 3. Hormonal Values**

| Median and range estrogen values |                       |                        |
|----------------------------------|-----------------------|------------------------|
|                                  | Group I               | Group II               |
| Subgroup a                       | 315 (48–1150) pg/ml   | 295 (40–995) pg/ml     |
| Subgroup b                       | 198 (49–380) pg/ml    | 190 (58–370) pg/ml     |
| Subgroup c                       | 58 (12–90) pg/ml      | 60 (10–84) pg/ml       |
| Subgroup d                       | 24 (10–30) pg/ml      | 21 (10–32) pg/ml       |
| Median and range FSH values      |                       |                        |
| Subgroup a                       | 20 (6–25) mIU/ml      | 15.8 (4.3–20.5) mIU/ml |
| Subgroup b                       | 17 (3–24.1) mIU/ml    | 18.8 (4–254) mIU/ml    |
| Subgroup c                       | 2.5 (1–4) mIU/ml      | 2.8 (0.5–4.8) mIU/ml   |
| Subgroup d                       | 1.1 (0.5–20.7) mIU/ml | 1 (0.6–1.3) mIU/ml     |

doi:10.1371/journal.pone.0066616.t003

high doses of tamoxifen (up to 120 mg), so they proposed escalating doses of anti-estrogens to avoid high levels of estrogens. We know that estrogen levels can increase 3–10 fold with tamoxifen use depending [16,17] on the time in the cycle it is given. It also seems to be variable from patient to patient. The rise in estrogen levels could theoretically interfere with the anti-tumoral effects of tamoxifen because the latter competitively inhibits estrogen binding to its receptor. There is however no evidence in the literature that this occurs or has any impact on the benefits of tamoxifen therapy in premenopausal women. The results of meta-analyses published after 1995 [6] are similar in both premenopausal and postmenopausal patients. The decreased risk of recurrence in patients under +/-50 years of age is 27+/-7%, while the reduction in the odds of death is 17+/-10%. For patients aged 50 years or more, the reduction in the annual odds of recurrence is 30+/-2% and in the annual odds of death 19+/-3%. Results of the different meta-analyses of the EBCTCG have

**Kaplan-Meier curve by group**

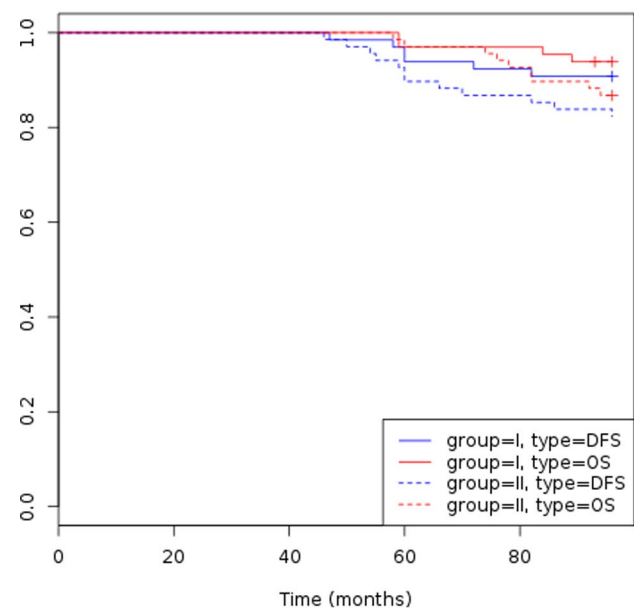

**Figure 3. Disease-free survival and overall survival in group I and group II.**

doi:10.1371/journal.pone.0066616.g003

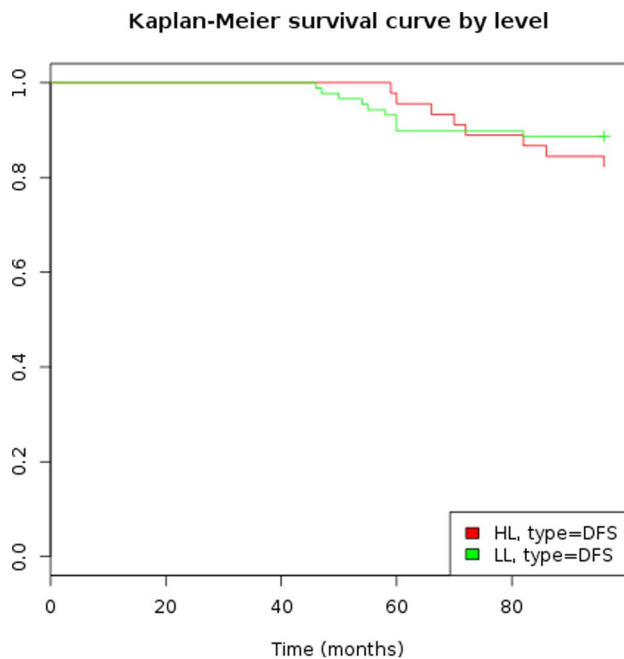

**Figure 4. Disease-free survival according to 17-beta-estradiol level.**

doi:10.1371/journal.pone.0066616.g004

yielded consolidated data on hormonal treatment of premenopausal patients, but data on the interaction of tamoxifen with ovarian function are rarely published in the literature [16,17,18]. It is known that tamoxifen may increase plasma 17-beta-estradiol concentrations by interfering with normal negative pituitary feedback mechanisms, with a resulting increase in FSH-driven ovarian steroidogenesis [19].

However, there may be additional mechanisms involved, including direct interaction of tamoxifen with granulosa cells, increased FSH concentrations and thus estrogen production, as well as modified LH receptor expression (studies published by Murray and Rafdim) [1,17]. Amenorrhea is therefore an insufficient parameter to define menopausal status in patients receiving tamoxifen, and it becomes even more problematic in patients who have undergone chemotherapy, because chemotherapy-related amenorrhea is very frequent [14]. Patients receiving 4 cycles of EC treatment recovered menses in almost all cases before

## References

- Rafdim PM, Fritz NF, Tormey DC, Jordan VC (1988) Endocrine status of premenopausal node negative breast cancer patients following adjuvant chemotherapy and long-term tamoxifen. *Cancer Res*, 48: 1026–9.
- Dellapasqua S, Colleoni M, Gelber RD, Goldhirsch A (2005) Adjuvant endocrine therapy for premenopausal women with early breast cancer. *J Clin Oncol*; 23 (8): 1736–50.
- Gonzalez Martin A, de la Cruz S, Marquez R (2010) Adjuvant endocrine therapy in premenopausal women with breast cancer. *Breast Cancer Res. Treat.*; 10: 1045–52.
- Early Breast Cancer Trialists' Collaborative Group (1992) Systematic treatment of early breast cancer by hormonal, cytotoxic or immune therapy: 133 randomized trials involving 31,000 recurrences and 24,000 deaths among 75,000 women. *Lancet*; 339(1): 71–85.
- Early Breast Cancer Trialists' Collaborative Group (2005) Effects of chemotherapy and hormonal therapy for early breast cancer on recurrence and 15-year survival: an overview of the randomised trials. *Lancet*; 365(9472): 1687–1717.
- International Breast Cancer Study Group (2006) Tamoxifen after adjuvant chemotherapy for premenopausal women with lymph node positive breast cancer: international breast cancer study group trial 13–93. *J Clin Oncol*; 24: 1332–41.
- Ortman O, Pagani O, Jones A, Mass N, Noss D, et al (2011) Which factors should be taken into account in perimenopausal women with early breast cancer who may become eligible for an aromatase inhibitor? Recommendations of an expert panel. *Cancer Treatment Reviews*; 97–104.
- Guidelines of the NCCN (2011) Definition of menopause. Available: <http://www.nccn.org/professionals/physicians/pdf/breast.pdf>.
- Burger HG, Hale GE, Robertson DM, Dennerstein L (2007) A review of hormonal changes during the menopausal transition: focus on findings from the Melbourne Women's Midlife Health Project. *Hum Reprod Update*; 13: 559–565.
- Cuzick J, Ambroisine L, Davidson N, Jakesz R, Kaufmann M, et al. (2007) Use of luteinising-hormone-releasing hormone agonists as adjuvant treatment in premenopausal patients with hormone-receptor-positive breast cancer: a meta-analysis of individual patient data from randomised adjuvant trials. *Lancet*; 369(9574): 1711–1723.
- Walshe JM, Denduluri N, Swain SM (2006) Amenorrhea in premenopausal women for breast cancer. *J Clin Oncol*; 24: 5769–79.
- Ganz PA, Land SR, Geyer CE, Cecchini RS, Costantino JP, et al. (2011) Menstrual history and quality of life outcomes in women with node positive breast cancer treated with adjuvant therapy on the NSABP B-30 trial. *J Clin Oncol* ([jco.ascpubs.org/content/29/9/1110.long](http://jco.ascpubs.org/content/29/9/1110.long)).

beginning endocrine treatment, but those undergoing 6 cycles of FEC chemotherapy recovered menses only later, which is why it is necessary to use biological parameters. The most common biomarkers used in this study were FSH and estradiol. We did not test anti-Müllerian hormone (AMH) or inhibin B, as data published in the literature are still controversial: some studies show interesting results with AMH and inhibin, but others reveal inconsistencies [20,21]. Another hypothesis to explain the pattern of menses observed with tamoxifen treatment could be the potential role of pharmacogenomics, with an impact of CYP2D6 [22,23,24,25,26]. An explanation for the different patterns of ovarian function observed while on tamoxifen treatment will perhaps be found in the metabolism of tamoxifen. Indeed, tamoxifen is a prodrug that is metabolized to active metabolites: N-desmethyl-tamoxifen, 4-hydroxy-N-desmethyl-tamoxifen (endoxifen) and 4-hydroxytamoxifen. These metabolites have up to 33 times more affinity for the estrogen receptor than tamoxifen. Both endoxifen and 4-hydroxytamoxifen have similar potency, in vitro and in vivo, to both the ER $\alpha$  and ER $\beta$  receptors. They have a similar dose-response relationship on several ER-positive breast cancer cell lines. Endoxifen is also a potent antagonist of the progesterone receptor gene, with similar potency than 4-hydroxytamoxifen. Among the active metabolites, endoxifen is probably the most clinically relevant in terms of hormone receptor blockade, since its plasma concentration is 5–10 times higher than that of 4-hydroxytamoxifen. We did not evaluate endoxifen or 4-hydroxytamoxifen in our study, but this probably constitutes a very interesting approach that needs to be investigated in prospective studies.

## Conclusion

Amenorrhea while on tamoxifen does not, in itself, confirm definitive menopause. Ovarian response to tamoxifen exhibits different patterns, not found to be influenced by previous administration of chemotherapy in our study. Tamoxifen metabolism looks to be an interesting tool that needs to be further investigated in prospective studies in an attempt to explain ovarian response to tamoxifen.

## Author Contributions

Conceived and designed the experiments: MB PHP CG JPM. Analyzed the data: MB FPD FD JFB LD CG PHP JPM. Contributed reagents/materials/analysis tools: MB FD LD JFB. Wrote the paper: MB FPD. Reviewed all statistical analysis: AVM.

13. Petrek JA, Naughton MJ, Caze LD, Paskett ED, Naftalis EZ, et al. (2006) Incidence, time course and determinants of menstrual bleeding after breast cancer treatment: a prospective study. *J Clin Oncol*; 24: 1045–51.
14. Shapiro CL, Recht A (2001) Side effect of adjuvant treatment of breast cancer. *New Engl J Med*; 344: 1997–2008.
15. Manni A, Pearson OH (1980) Antiestrogen induced remissions in premenopausal women with stage IV breast cancer: effects on ovarian function. *Cancer Treat Rep*; 64: 779–85.
16. Jordan VC, Fritz NF, Langan-Fahey S, Thompson M, Tormey DC (1991) Alteration of endocrine parameters in premenopausal women with breast cancer during long-term adjuvant therapy with tamoxifen as the single-agent. *J Natl Cancer Inst*; 83: 1488–91.
17. Jordan VC, Fritz NF, Tormey DC (1987) Endocrine effects of adjuvant chemotherapy and long-term tamoxifen administration on node-positive patients with breast cancer. *Cancer Res*; 47: 624–30.
18. Mourits MJ, Devries EG, Ten Hoor KA, Van der Zee AGJ, Willemse PHB (2007) Beware of amenorrhea during tamoxifen: it may be a wolf in sheep's clothing. *J Clin Oncol*; 25: 3787–8.
19. Speroff L, Glass RH, Kase NG (1999) *Clinical gynaecologic endocrinology and infertility*. Ed. Philadelphia PA, Lippincott, Williams and Wilkins.
20. Bath LE, Wallace WH, Shaw MP, Fitzpatrick C, Anderson A (2003) Depletion of ovarian reserve in young women after treatment for cancer in childhood: detection by an anti-Müllerian hormone, inhibin-B and ovarian ultrasound. *Hum Reprod*; 18:2368–74.
21. Su HI, Sammel MD, Green J, Velders L, Stankiewicz C, et al. (2010) Anti-müllerian hormone and inhibin B are hormone measures of ovarian function in late reproductive-aged breast cancer survivors. *Cancer*; 116(3): 592–9.
22. Sakurai K, Enomoto K, Amano S (2011) Recovery of menstruation after long-term chemotherapy and endocrine therapy in pre-menopausal patients with breast cancer. *J Cancer Res Chim Oncol*; 137(4): 615–20.
23. Ahmad A, Shahabuddin S, Sheikh S, Kale P, Krishnappa M, et al. (2010) Endoxifen, a new cornerstone of breast cancer therapy: demonstration of safety, tolerability, and systemic bioavailability in healthy human subjects. *Clin Pharmacol Ther*; 86 (6): 814–7.
24. Geutz MP, Rac JM, Suman VJ, Safgren SL, Ames MM, et al. (2005) Pharmacogenetics of tamoxifen biotransformation is associated with clinical outcomes of efficacy and hot flushes. *J Clin Oncol*; 23: 9312–8.
25. Singh MS, Francis PA, Michael M (2005) Tamoxifen, cytochrome P450 genes and breast cancer clinical outcomes. *Breast*; 20(2): 111–8.
26. Stebbing J, Stearn SV, Davidson NE (2007) Role of CYP2D6 testing in selection of endocrine therapy for breast cancer. *Pharmacogenomics*; 8: 1–3.
